# Supplementary material
Source: publisher figshare collection journal article supplement (https://frontiersin.figshare.com/ndownloader/files/22190190)
Supplement: Supplementary file [file 22190190]

# Supplementary Material

## DOPAMINE RECEPTOR D1 CONTRIBUTES TO COCAINE EPIGENETIC REPROGRAMMING OF HISTONE MODIFICATIONS IN MALE GERM CELLS

Betina González, Samanta N. Gancedo, Sahira A. Janeir Garazatua, Eduardo Roldán, Alfredo D. Vitullo, Candela R. González

The following images represent the raw data obtained for each western blot experiment showed in the manuscript. The red rectangles show the portion of the image that is shown in the manuscript figures.

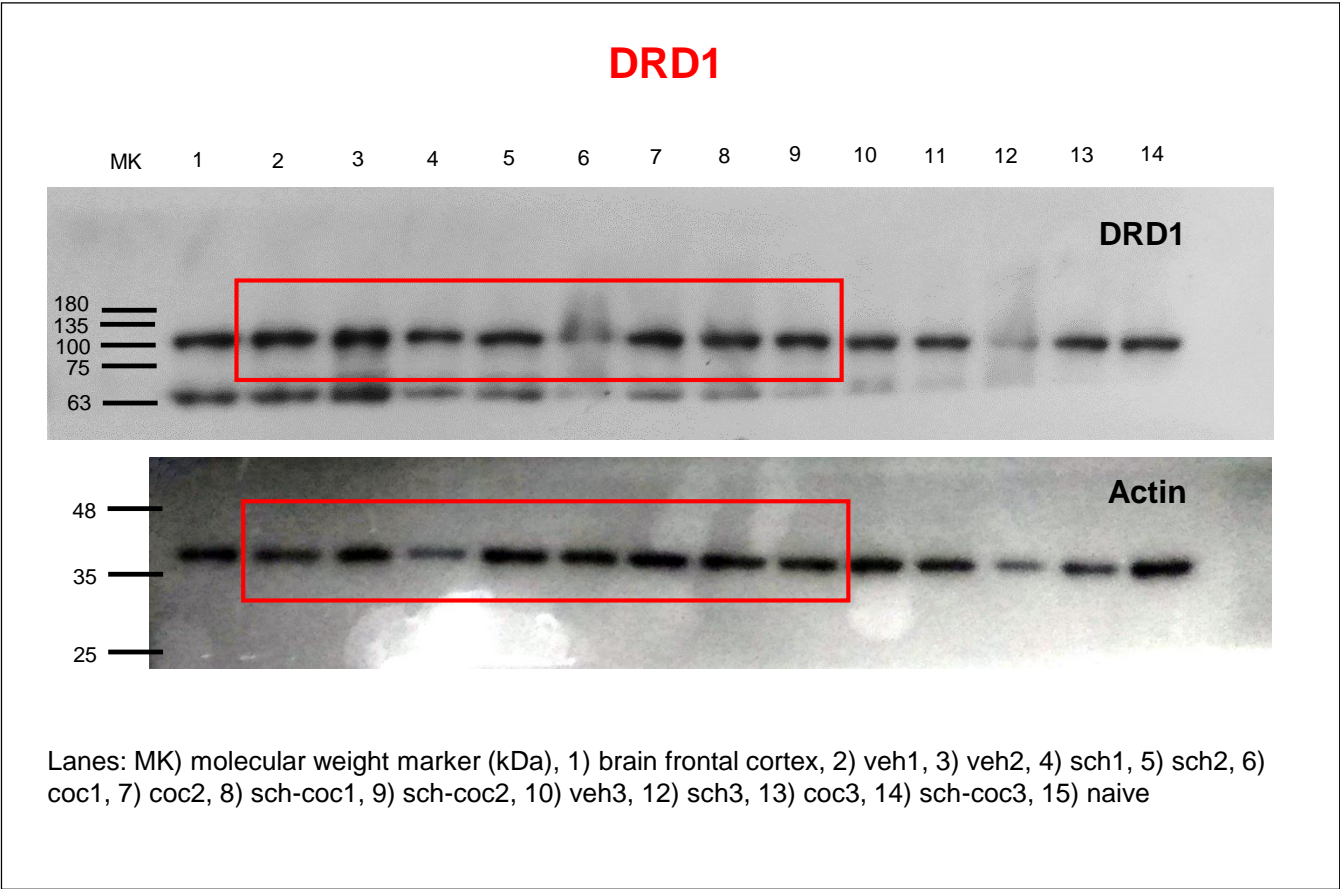

## H3K9me3

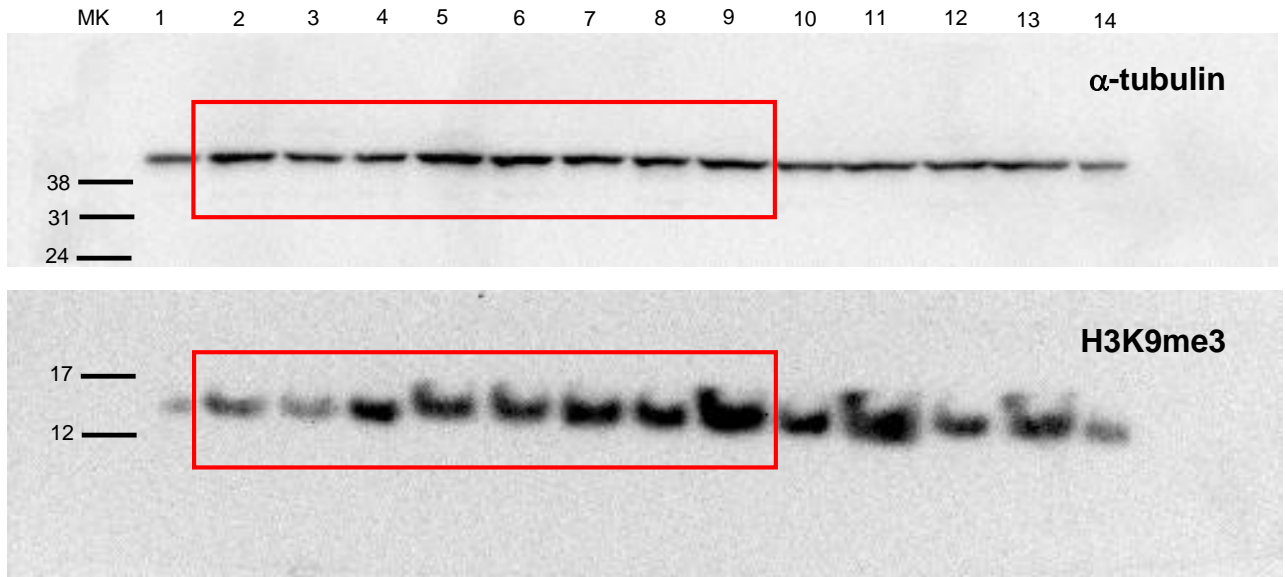

Lanes: MK) molecular weight marker (kDa), 1) naive, 2) veh1, 3) veh2, 4) sch1, 5) sch2, 6) coc1, 7) coc2, 8) sch-coc1, 9) sch-coc2, 10) coc3, 11) sch3, 12) coc4, 13) sch-coc4, 14) veh3

## H3K27me3

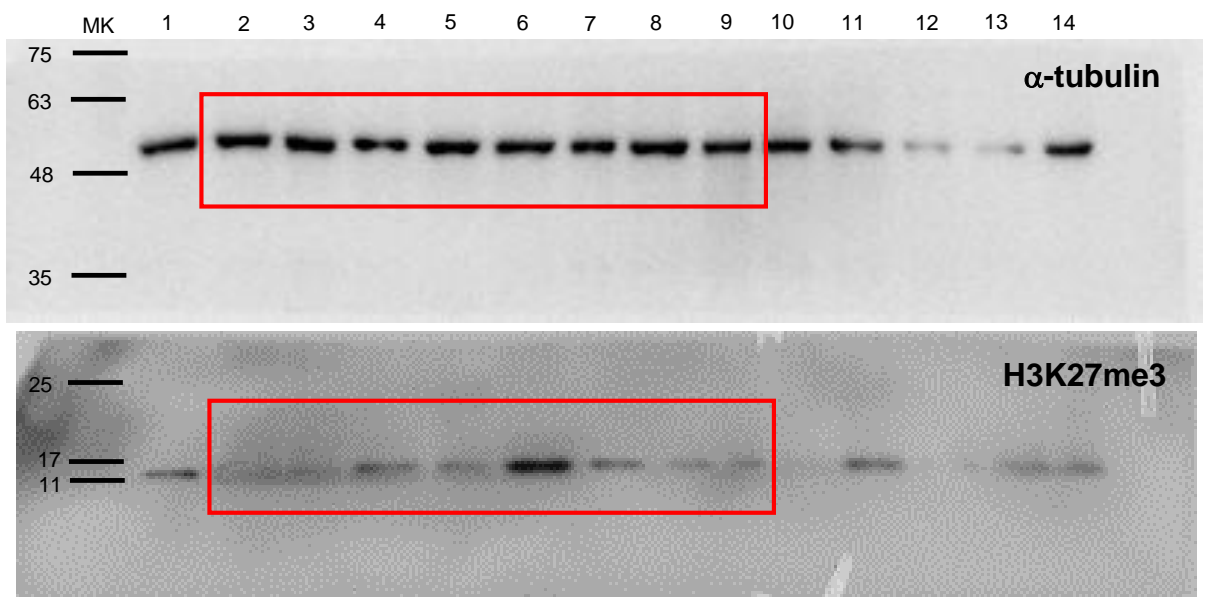

Lanes: MK) molecular weight marker (kDa), 1) brain frontal cortex, 2) veh1, 3) veh2, 4) sch1, 5) sch2, 6) coc1, 7) coc2, 8) sch-coc1, 9) sch-coc2, 10) veh3, 11) sch3, 12) coc3, 13) sch-coc3, 14) Naive

## H3K27ac

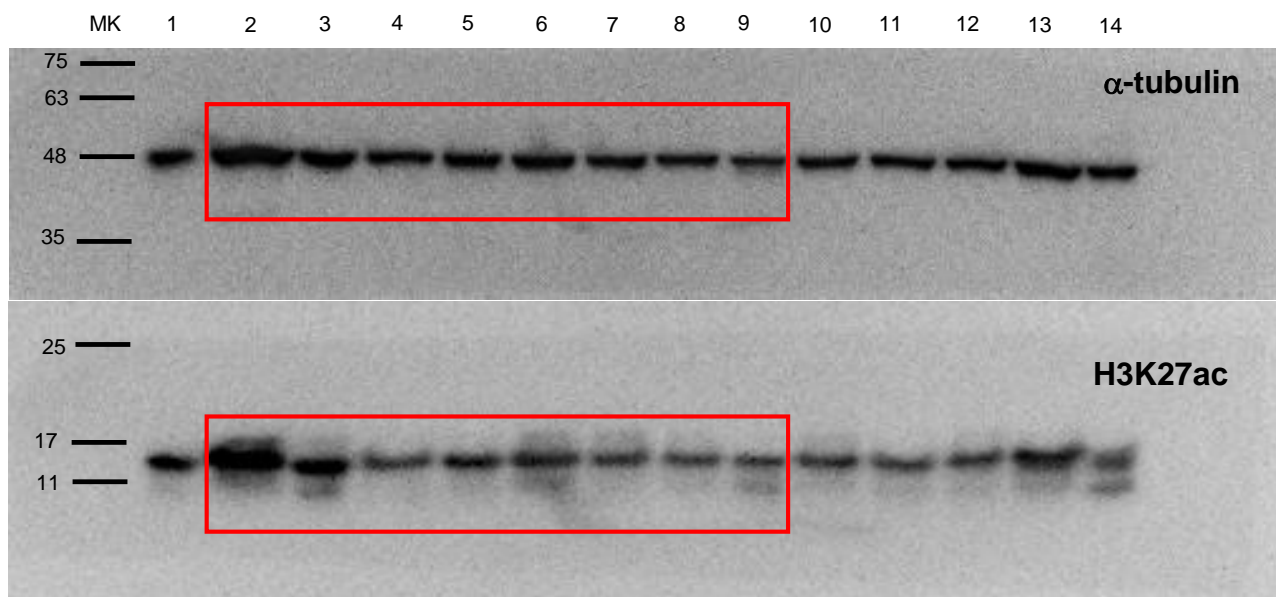

Lanes: MK) molecular weight marker (kDa), 1) naive, 2) veh1, 3) veh2, 4) sch1, 5) sch2, 6) coc1, 7) coc2, 8) sch-coc1, 9) sch-coc2, 10) coc3, 11) sch3, 12) coc4, 13) sch-coc4, 14) veh3

## H3K4me3

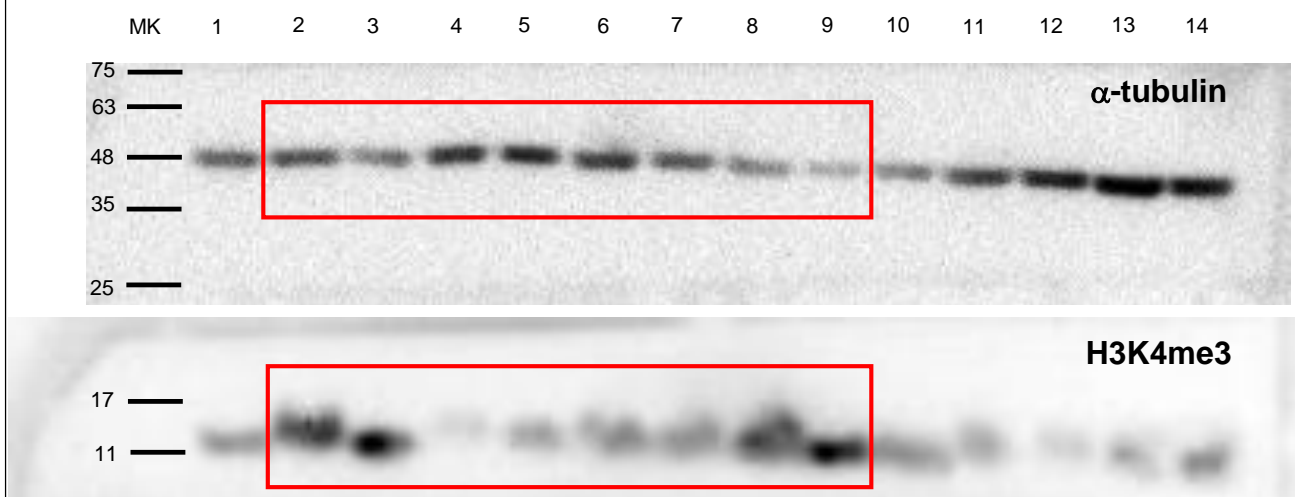

Lanes: MK) molecular weight marker (kDa), 1) naive, 2) veh1, 3) veh2, 4) sch1, 5) sch2, 6) coc1, 7) coc2, 8) sch-coc1, 9) sch-coc2, 10) coc3, 11) sch3, 12) coc4, 13) sch-coc4, 14) veh3

H3K9ac

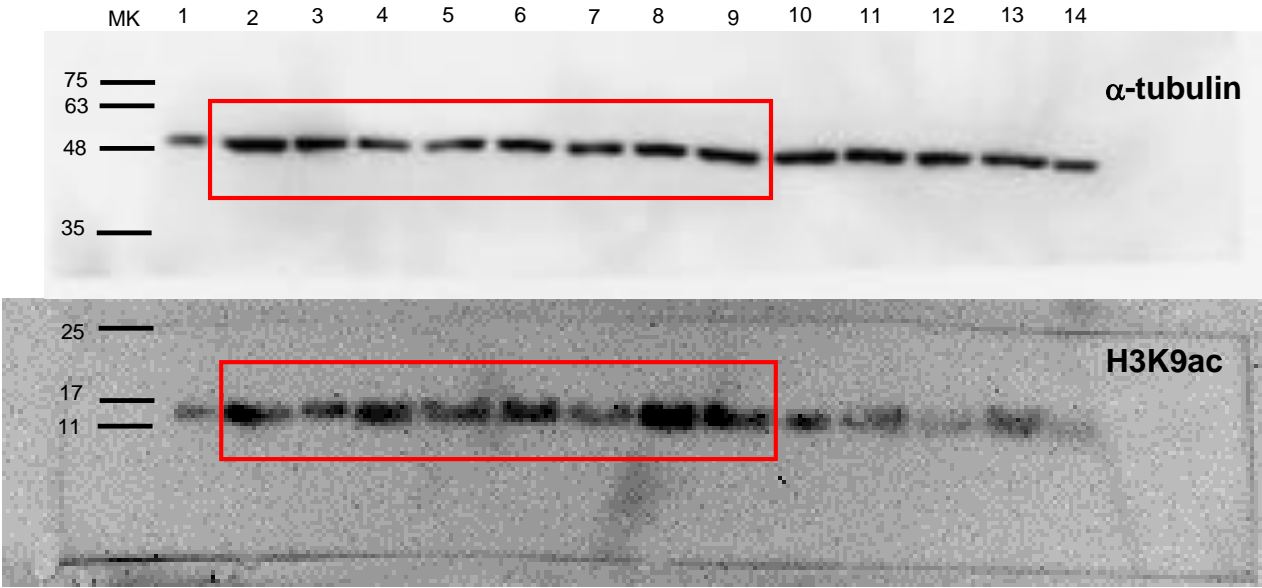

Lanes: MK) molecular weight marker (kDa), 1) naive, 2) veh1, 3) veh2, 4) sch1, 5) sch2, 6) coc1, 7) coc2, 8) sch-coc1, 9) sch-coc2, 10) coc3, 11) sch3, 12) coc4, 13) sch-coc4, 14) veh3

H4K16ac

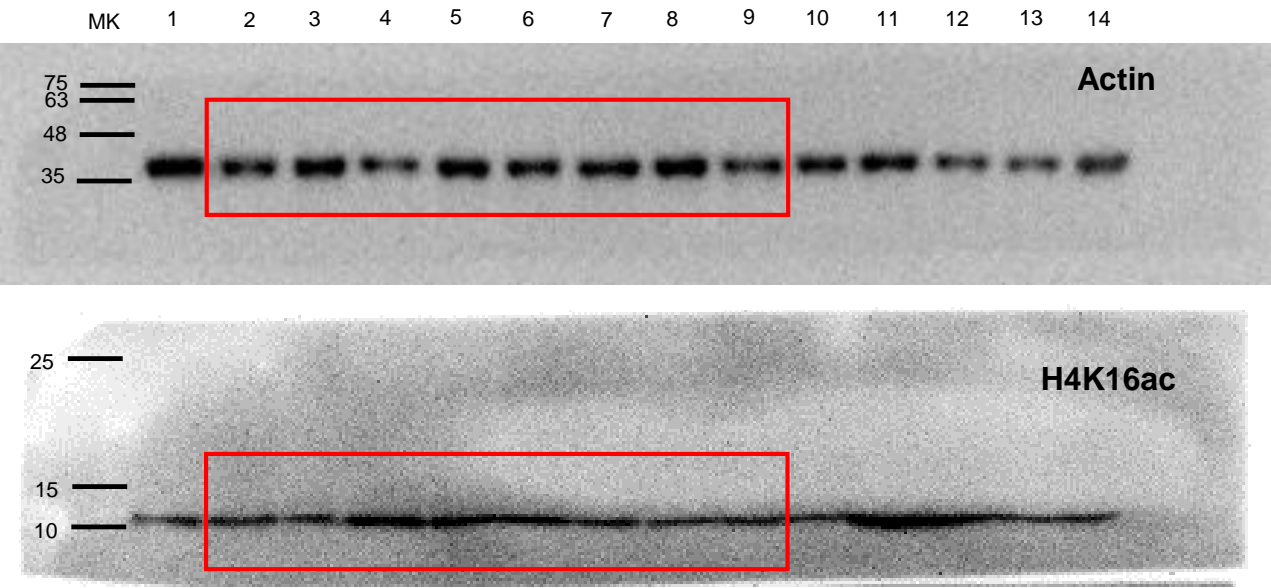

Lanes: MK) molecular weight marker (kDa), 1) brain frontal cortex, 2) veh1, 3) veh2, 4) sch1, 5) sch2, 6) coc1, 7) coc2, 8) sch-coc1, 9) sch-coc2, 10) veh3, 11) sch3, 12) coc3, 13) sch-coc3, 14) naive

# HDAC1

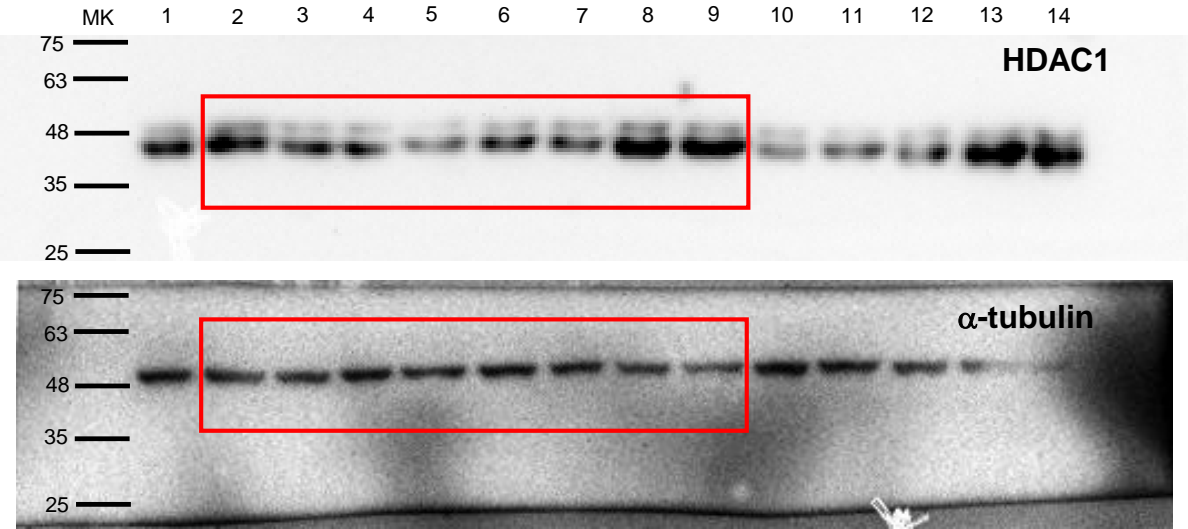

Lanes: MK) molecular weight marker (kDa), 1) naive, 2) veh1, 3) veh2, 4) sch1, 5) sch2, 6) coc1, 7) coc2, 8) sch-coc1, 9) sch-coc2, 10) coc3, 11) sch3, 12) coc4, 13) sch-coc4, 14) veh3

# HDAC2

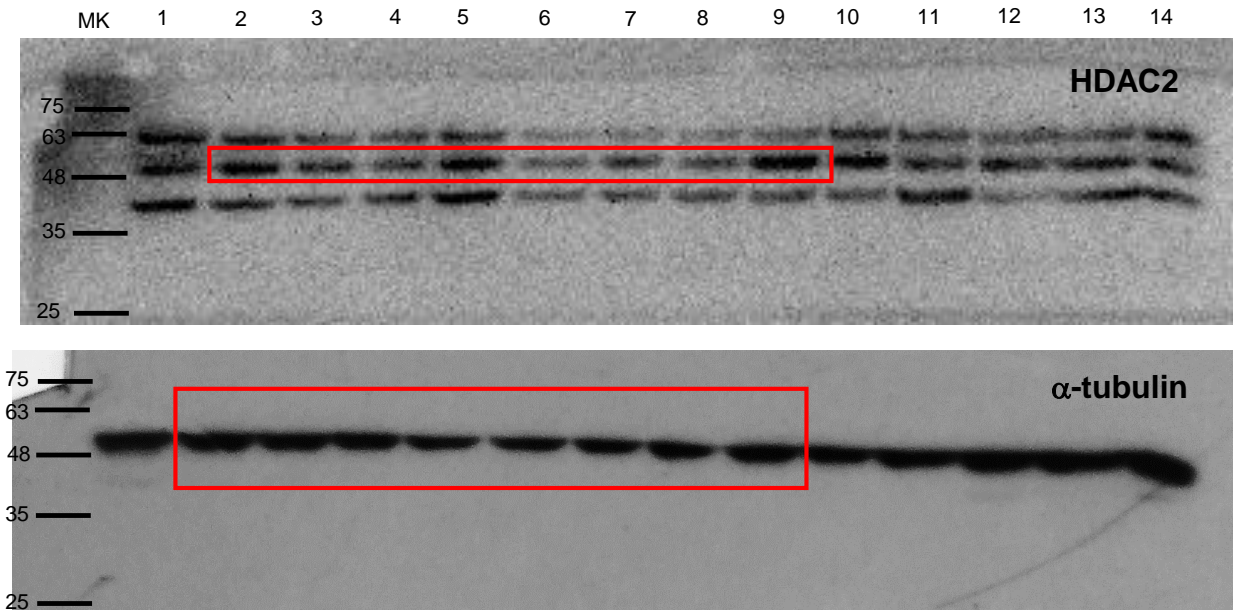

Lanes: MK) molecular weight marker (kDa), 1) brain frontal cortex, 2) veh1, 3) veh2, 4) sch1, 5) sch2, 6) coc1, 7) coc2, 8) sch-coc1, 9) sch-coc2, 10) veh3, 11) sch3, 12) coc3, 13) sch-coc3, 14) naive



## SIRT1

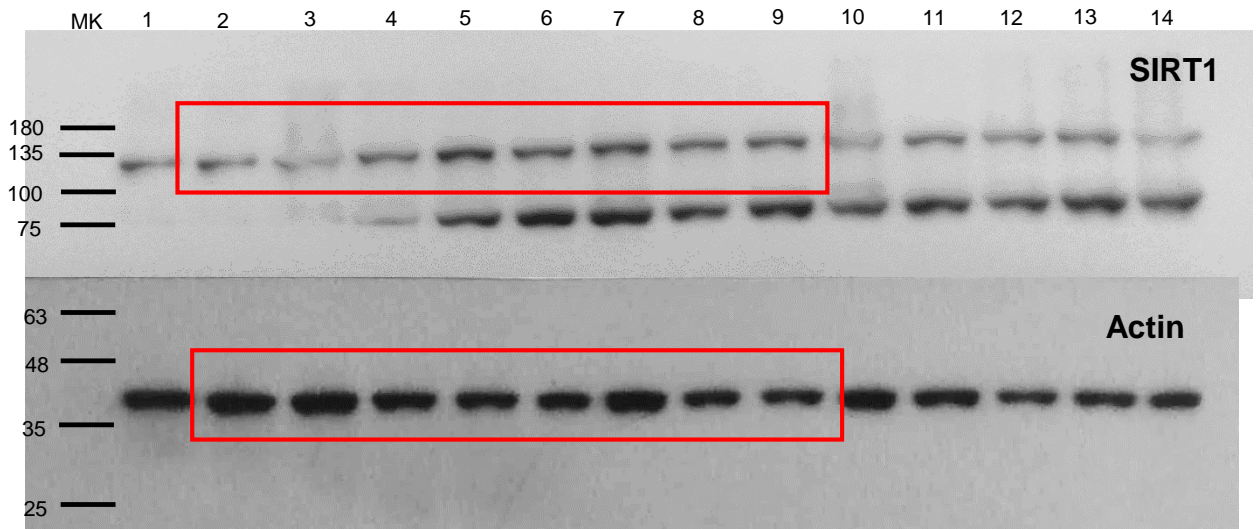

Lanes: MK) molecular weight marker (kDa), 1) naive, 2) veh1, 3) veh2, 4) sch1, 5) sch2, 6) coc1, 7) coc2, 8) sch-coc1, 9) sch-coc2, 10) coc3, 11) sch3, 12) coc4, 13) sch-coc4, 14) veh3

## TIP60

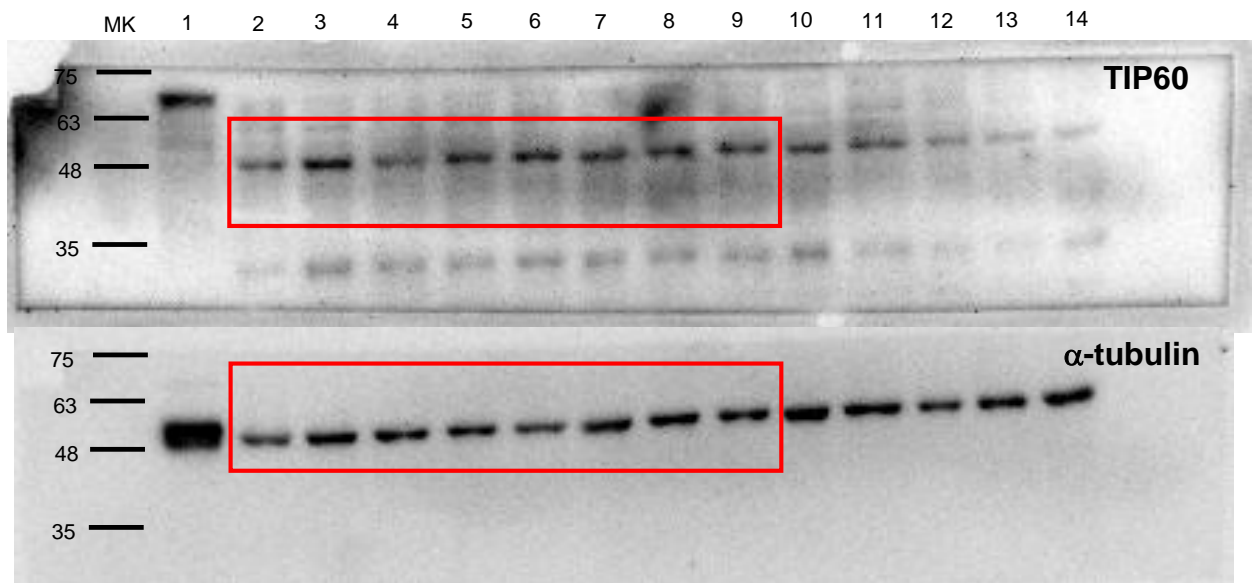

Lanes: MK) molecular weight marker (kDa), 1) brain frontal cortex, 2) veh1, 3) veh2, 4) sch1, 5) sch2, 6) coc1, 7) coc2, 8) sch-coc1, 9) sch-coc2, 10) veh3, 11) sch3, 12) coc3, 13) sch-coc3, 14) naive

**MOF**

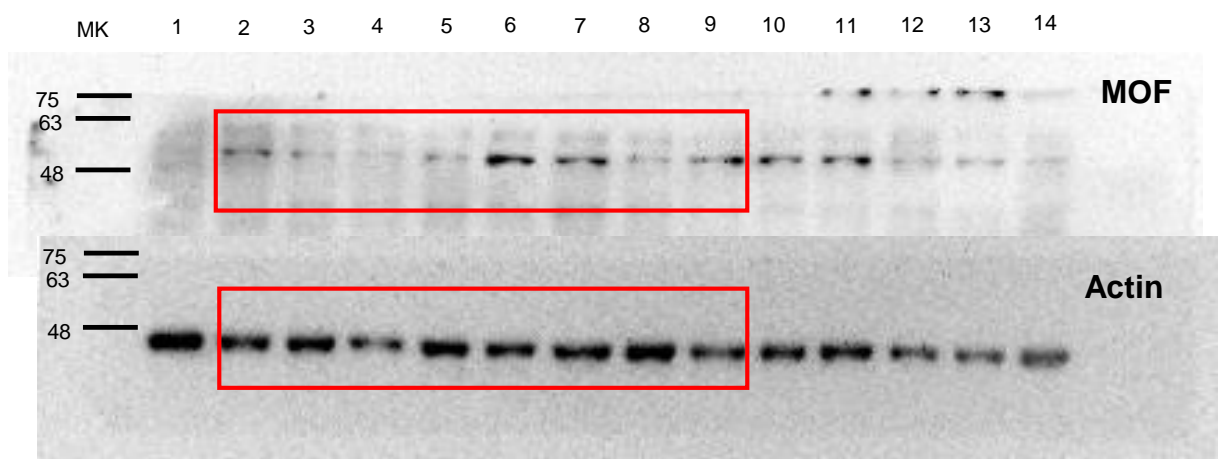

Lanes: MK) molecular weight marker (kDa), 1) naive, 2) veh1, 3) veh2, 4) sch1, 5) sch2, 6) coc1, 7) coc2, 8) sch-coc1, 9) sch-coc2, 10) coc3, 11) sch3, 12) coc4, 13) sch-coc4, 14) veh3

**KDM1A/LSD1**

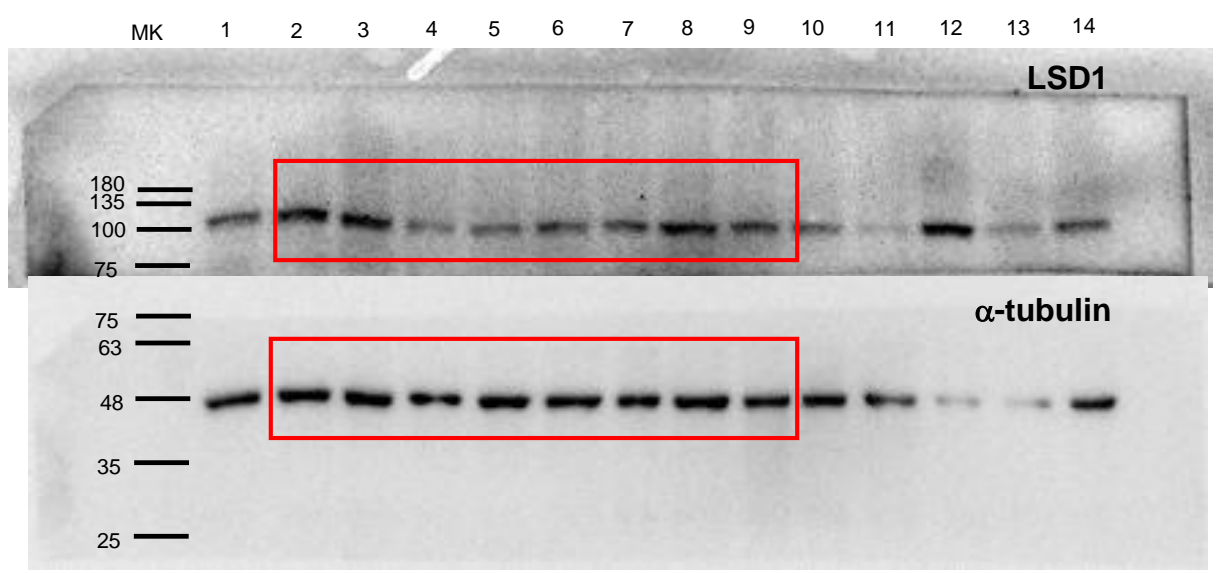

Lanes: MK) molecular weight marker (kDa), 1) brain frontal cortex, 2) veh1, 3) veh2, 4) sch1, 5) sch2, 6) coc1, 7) coc2, 8) sch-coc1, 9) sch-coc2, 10) veh3, 11) sch3, 12) coc3, 13) sch-coc3, 14) naive

## KMT1C/G9a

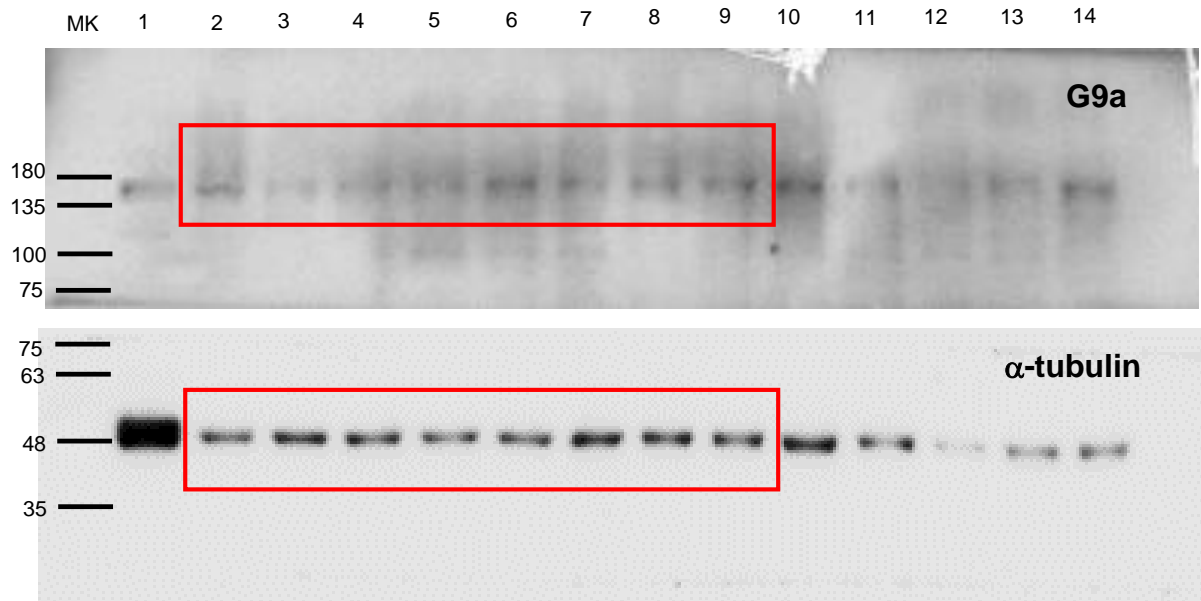

Lanes: MK) molecular weight marker (kDa), 1) brain frontal cortex, 2) veh1, 3) veh2, 4) sch1, 5) sch2, 6) coc1, 7) coc2, 8) sch-coc1, 9) sch-coc2, 10) coc3, 11) sch3, 12) coc4, 13) sch-coc4, 14) veh3
